# Supplementary material for: Nonlinear pathological trajectory of a high-myopia C57/BL6J mouse model induced by form deprivation
Source: Front Physiol. 2024 Oct 30;15:1442000. doi: 10.3389/fphys.2024.1442000 (PMC11557532; doi:10.3389/fphys.2024.1442000)
Supplement: Supplementary file 1 [file Table1.xlsx]

## Sheet: Sheet1
Supplementary Table 1 Ocular parameters of eyes of the NC and FDM groups at different time points
Time	Group	AL (mm)	CCT (mm)	ACD (mm)	LT (mm)	VCD (mm)	Refraction (D)	RT (mm)	ChT (mm)
0W	NC (OD)	2955.61±67.45	133.18±6.87	278.97±23.92	1829.44±69.79	698.13±34.09	-2.38±0.38	238.11±1.90	60.59±2.14
	NC (OS)	2960.28±70.42	134.58±5.73	280.37±17.19	1836.45±95.29	695.33±50.59	-2.32±0.34	238.29±1.93	60.62±1.76
	FDM (OD)	2964.49±83.58	131.78±6.82	275.70±17.78	1849.07±56.45	704.67±29.70	-2.25±0.35	237.88±1.47	60.17±2.17
	FDM (OS)	2962.62±82.99	135.51±15.12	278.50±16.09	1857.01±65.80	703.27±37.92	-2.35±0.34	238.32±2.05	60.47±1.63
4W	NC (OD)	3209.81±34.05	147.19±8.94	316.82±13.73	2158.88±29.76	584.58±44.53	9.17±0.46	240.01±1.70	67.10±2.06
	NC (OS)	3207.94±34.12	148.60±8.91	315.42±13.36	2170.10±42.48	578.97±48.24	9.16±0.43	240.23±1.63	67.42±1.84
	FDM (OD)	3211.22±49.57	148.60±6.82	320.56±21.41	2169.16±44.73	573.83±41.26	9.18±0.35	240.04±1.42	67.19±1.80
	FDM (OS)	3239.25±52.67	149.53±8.54	315.89±20.83	2183.18±48.90	594.86±39.06	4.31±0.37	236.60±2.58	63.74±2.05
8W	NC (OD)	3292.99±40.07	159.81±7.58	336.45±14.03	2248.60±26.25	549.53±32.91	5.54±0.31	241.66±1.78	77.51±1.59
	NC (OS)	3291.59±37.12	162.61±8.10	335.05±16.64	2250.94±32.48	548.13±34.10	5.45±0.41	241.56±1.64	77.83±1.66
	FDM (OD)	3293.46±42.44	156.54±8.42	333.64±15.24	2246.73±55.80	551.87±35.77	5.49±0.34	240.90±2.30	77.53±1.39
	FDM (OS)	3353.27±53.94	157.94±8.04	328.04±19.07	2248.13±44.24	626.17±41.92	-6.16±0.19	235.60±2.19	68.57±1.65
12W	NC (OD)	3372.43±12.14	147.20±12.07	338.78±10.45	2334.12±16.64	534.58±33.18	4.49±0.23	242.45±1.47	86.12±1.88
	NC (OS)	3371.96±13.09	147.20±10.62	342.06±9.92	2343.93±28.64	535.98±23.61	4.47±0.24	242.29±1.01	86.04±1.69
	FDM (OD)	3370.10±28.64	149.53±9.16	341.59±7.38	2348.13±24.71	532.71±38.15	4.46±0.25	241.54±2.11	86.38±1.26
	FDM (OS)	3460.75±30.11	154.20±12.92	343.46±11.37	2342.53±28.32	627.76±37.85	-14.37±0.57	234.72±1.97	75.02±1.51
W, week; AL, axial length; CCT, central corneal thickness; ACD, anterior chamber depth; LT, lens thickness; VCD, vitreous chamber depth; D, diopters; RT, retinal thickness; ChT, choroid thickness; NC (OD), the right eye of the NC group; NC (OS), the left eye of the NC group, FDM (OD), the right eye of the FDM group; FDM (OS), the left (covered) eye of the FDM group
